# Supplementary material for: Hyperbranched Poly(β-amino ester)s (HPAEs) Structure Optimisation for Enhanced Gene Delivery: Non-Ideal Termination Elimination
Source: Nanomaterials (Basel). 2022 Nov 4;12(21):3892. doi: 10.3390/nano12213892 (PMC9656648; doi:10.3390/nano12213892)
Supplement: Supplementary file 1 [file nanomaterials-12-03892-s001.zip › nanomaterials-1987911-SI.pdf]

## SUPPORTING INFORMATION

# Hyperbranched Poly( $\beta$ -amino ester)s (HPAEs) Structure Optimisation for Enhanced Gene Delivery: Non-Ideal Termination Elimination

Yinghao Li <sup>1,†</sup>, Zhonglei He <sup>1,2,†</sup>, Jing Lyu <sup>1</sup>, Xianqing Wang <sup>1</sup>, Bei Qiu <sup>1</sup>, Irene Lara-Sáez <sup>1</sup>, Jing Zhang <sup>3</sup>, Ming Zeng <sup>4</sup>, Qian Xu <sup>1</sup>, Sigen A <sup>1</sup>, James F. Curtin <sup>2,5,\*</sup>, and Wenxin Wang <sup>1,\*</sup>

<sup>1</sup> Charles Institute of Dermatology, School of Medicine, University College Dublin, D04 V1W8, Dublin, Ireland

<sup>2</sup> BioPlasma Research Group, School of Food Science and Environmental Health, Technological University Dublin, D07 H6K8, Dublin, Ireland

<sup>3</sup> State Key Laboratory of Materials-Oriented Chemical Engineering, College of Chemical Engineering, Nanjing Tech University, 30 Puzhu South Road, Nanjing 211816, China

<sup>4</sup> Department of Dermatology, The First Affiliated Hospital of Jinan University, Guangzhou Overseas Chinese Hospital, Guangzhou 510630, China

<sup>5</sup> Faculty of Engineering and Built Environment, Technological University Dublin, D07 H6K8, Dublin, Ireland

\* Correspondence: james.curtin@tudublin.ie (J.C.); wenxin.wang@ucd.ie (W.W.)

† These authors contributed equally to this work.

## Supplementary Figures

**Polymer: DNA = 30: 1**

**A-E7 D-E7 B-E7 E-E7 C-E7 F-E7 DNA**

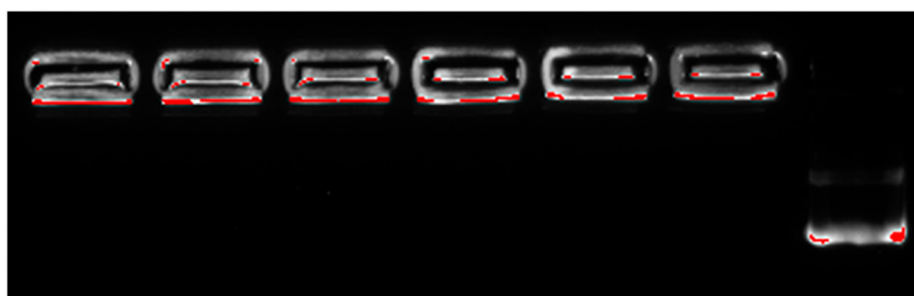

**Figure S1.** DNA condensation capacity of HPAEs at a w/w ratio of 30:1.

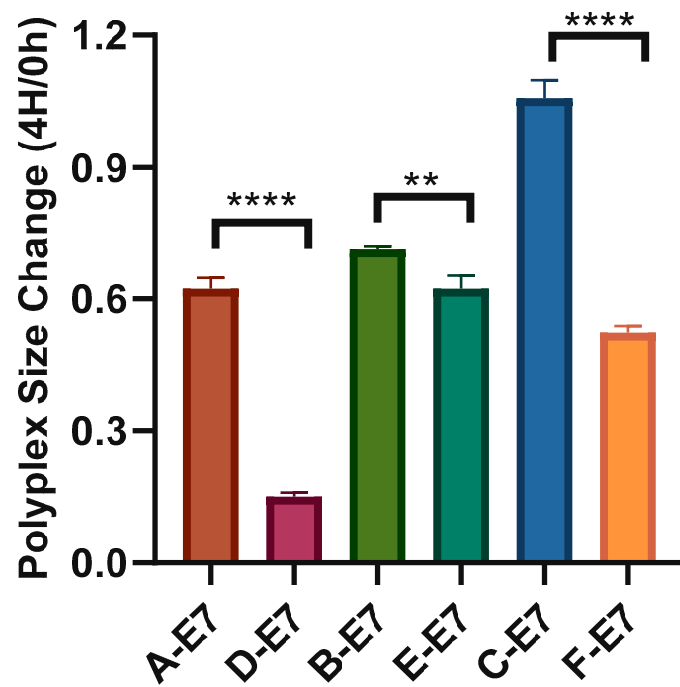

**Figure S2.** Polyplex stability in serum measure evaluated by the relative size change post 4h incubation at 37°C of HPAEs at a w/w ratio of 30:1.

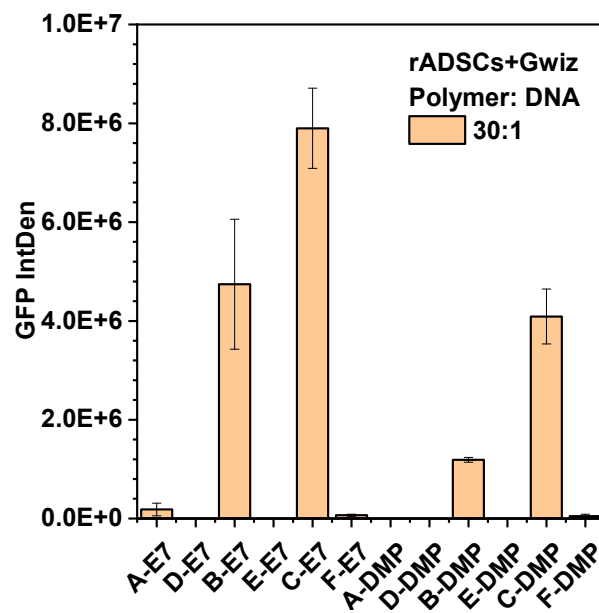

**Figure S3.** GFP expression of rADSCs cells post-transfection by different HPAE-based polyplexes at the ratio of 30:1 (polymer/ DNA w/w).

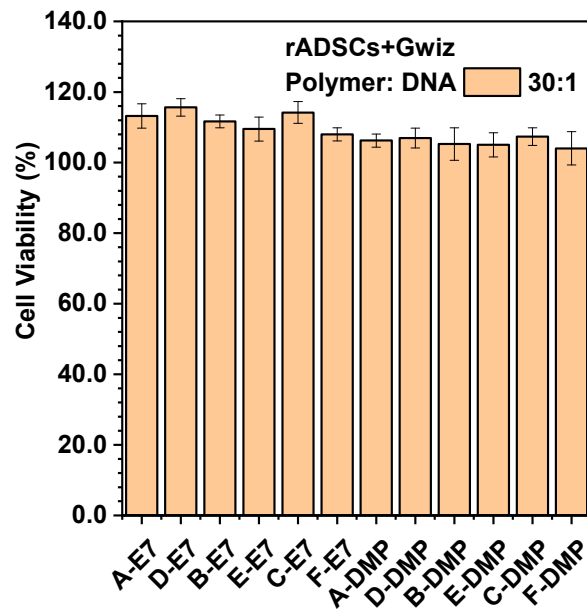

**Figure S4.** Cell viability of rADSCs cells post-transfection by different HPAE-based polyplexes at the ratio of 30:1 (polymer/ DNA w/w).
